# Supplementary material for: Characterization of CD4-Positive Lymphocytes in the Antiviral Response of Olive Flounder (Paralichthys oliveceus) to Nervous Necrosis Virus
Source: MDPI journal article supplement (doi:10.3390/ijms21114180), 2020-06-11
Supplement: s1 [file s1]

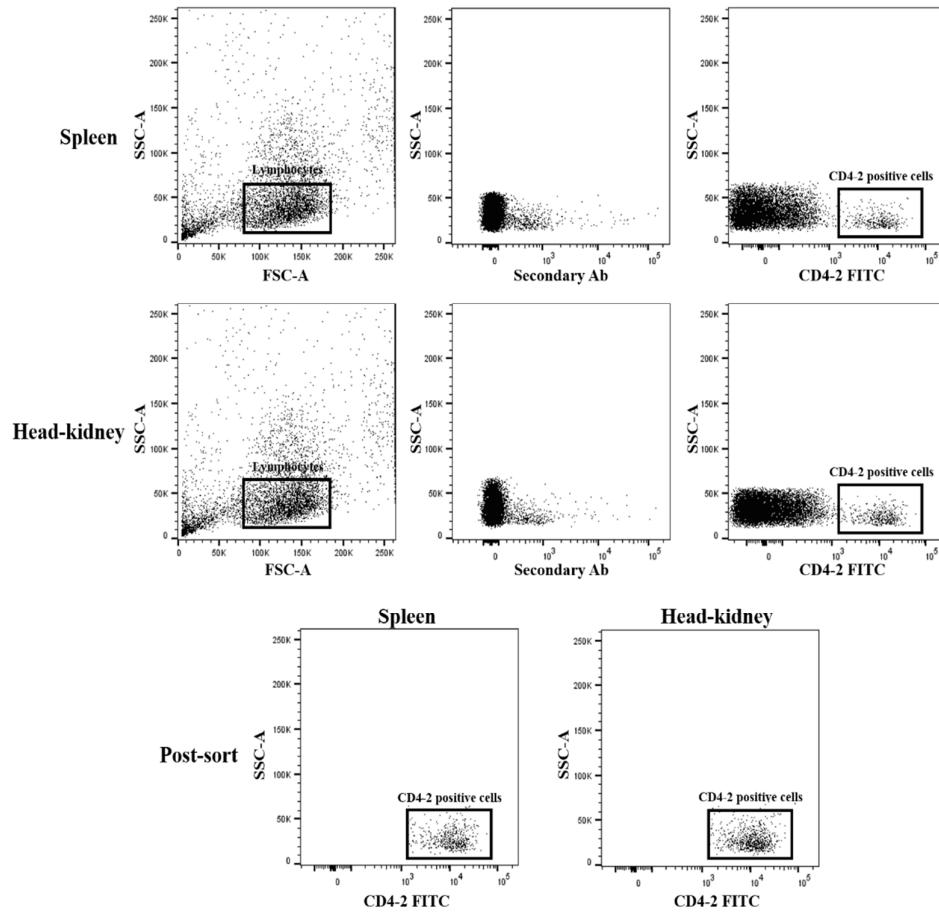

**Supplemental Figure 1. Pre- and post-sort analysis of CD4-2 negative and CD4-2 positive lymphocytes.** Leukocytes were obtained from spleen and head-kidney in olive flounder and lymphocytes were gated on FSC and SSC area. Cells treated only with secondary Ab (FITC) were represented in middle panel, and cells stained with anti-CD4-2 mAb (3C8) were shown in right panel.

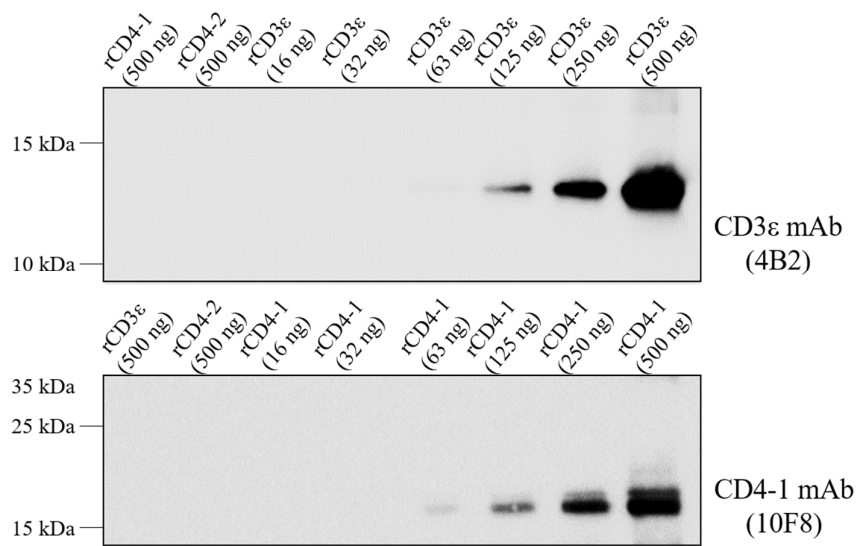

**Supplemental Figure 2. Specificity of anti-CD3 $\epsilon$  and CD4-1 mAbs.** Increasing amounts of recombinant CD3 $\epsilon$  and CD4-1 proteins were detected with anti-CD3 $\epsilon$  and anti-CD4-1 mAbs in immunoblot analysis. The recombinant CD3 $\epsilon$  protein reacted with the anti-CD3 $\epsilon$  mAb (4B2) to produce a band of approximately ~ 15kDa, and the recombinant CD4-1 protein reacted with the anti-CD4-1 mAb (10F8-3) to produce a band with a molecular weight of approximately ~ 17 kDa.
